# Supplementary material for: Simultaneously achieving room-temperature circularly polarized luminescence and high stability in chiral perovskite nanocrystals via block copolymer micellar nanoreactors
Source: Royal Society of Chemistry journal article supplement (doi:10.1039/d2ta06996b), 2023-01-01
Supplement: d2ta06996b1.pdf [file d2ta06996b1.pdf]

## Electronic Supplementary Information

### **Simultaneously achieving room-temperature circularly polarized luminescence and high stability in chiral perovskite nanocrystals via block copolymer micellar nanoreactors**

Minju Kim<sup>a</sup>, Jiweon Kim<sup>a</sup>, Jieun Bang<sup>a</sup>, Yu Jin Jang<sup>b</sup>, JaeHong Park<sup>a,c</sup>, and Dong Ha Kim<sup>a,c,d\*</sup>

*a. Department of Chemistry and Nano Science, Division of Molecular and Life Sciences, College of Natural Sciences, Ewha Womans University, 52, Ewhayeodae-gil, Seodaemun-gu, Seoul 03760, Republic of Korea*

*b. Research Center for Energy and Environmental Sciences, Sungkyunkwan University (SKKU), 2066 Seobu-ro, Jangan-gu, Suwon, Gyeonggi-do 16419, Republic of Korea*

*c. Nanobio-Energy Materials Center (National Research Facilities and Equipment Center), Ewha Womans University, 52, Ewhayeodae-gil, Seodaemun-gu, Seoul 03760, Republic of Korea*

*d. Basic Sciences Research Institute (Priority Research Institute), Ewha Womans University, 52, Ewhayeodae-gil, Seodaemun-gu, Seoul 03760, Republic of Korea*

\*Corresponding author: Dong Ha Kim

E-mail address: [dhkim@ewha.ac.kr](mailto:dhkim@ewha.ac.kr)

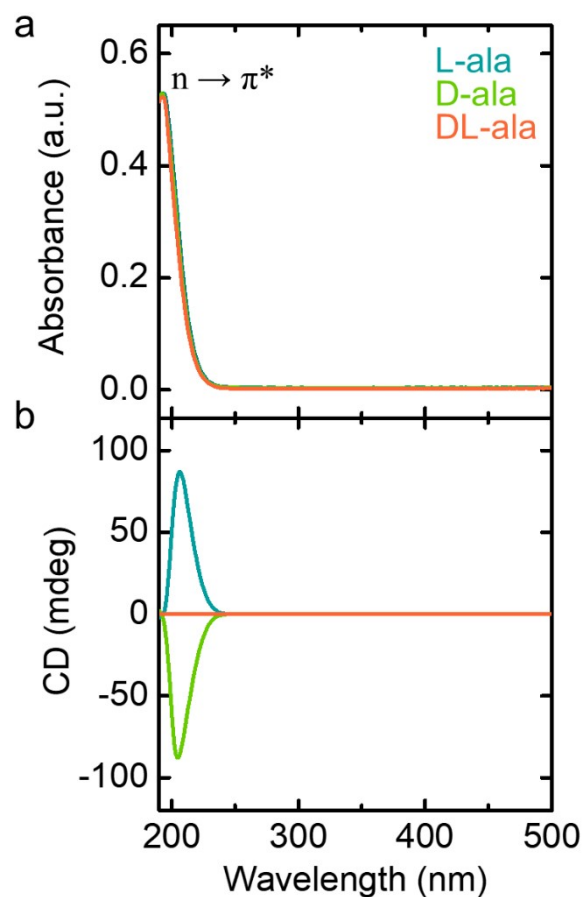

**Figure S1.** (a) Absorbance and (b) CD spectra of *L*-, *D*-, or *DL*-ala dissolved in deionized water. The absorption peak at 206 nm is attributed to the  $n-\pi^*$  transition of the carboxyl acid group in the alanine.

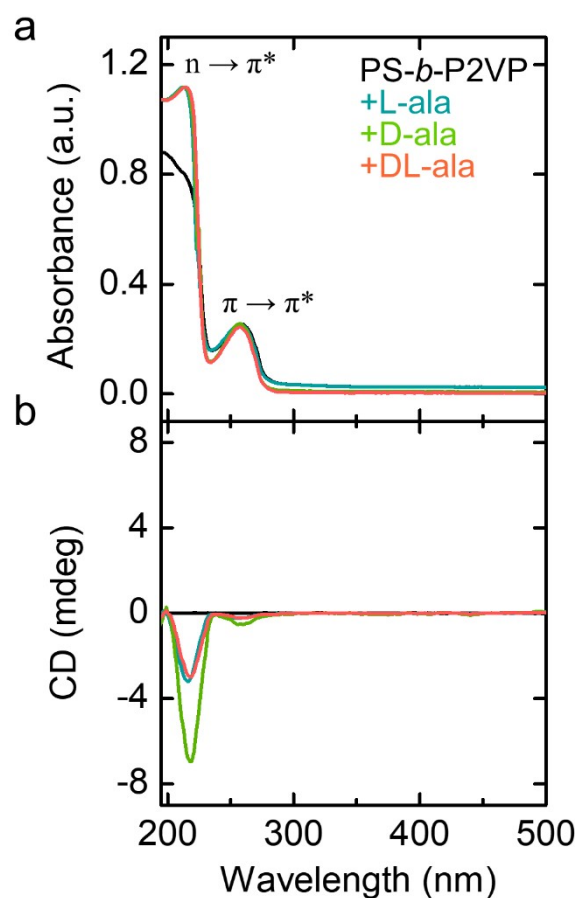

**Figure S2.** (a) Absorbance and (b) CD spectra of PS-*b*-P2VP complexed with *L*-, *D*-, or *DL*-ala in isopropyl alcohol. The two absorption peaks at 215 and 260 nm correspond to the  $n\text{-}\pi^*$  and  $\pi\text{-}\pi^*$  transitions of the pyridine group, respectively. The solutions were filtered through PTFE filters (0.45  $\mu\text{m}$ ) to remove remaining free alanine molecules.

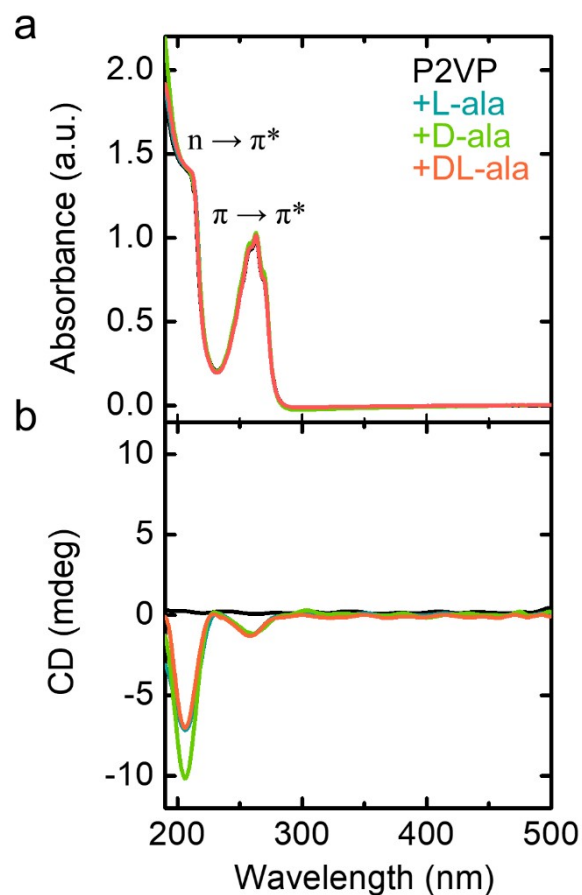

**Figure S3.** (a) Absorbance and (b) CD spectra of P2VP complexed with *L*-, *D*-, or *DL*-ala in isopropyl alcohol. The two absorption peaks of 207 and 259 nm correspond to the  $n\text{-}\pi^*$  and  $\pi\text{-}\pi^*$  transitions of the pyridine group, respectively. The solutions were filtered through PTFE filters (0.45  $\mu\text{m}$ ) to eliminate remaining free alanine molecules.

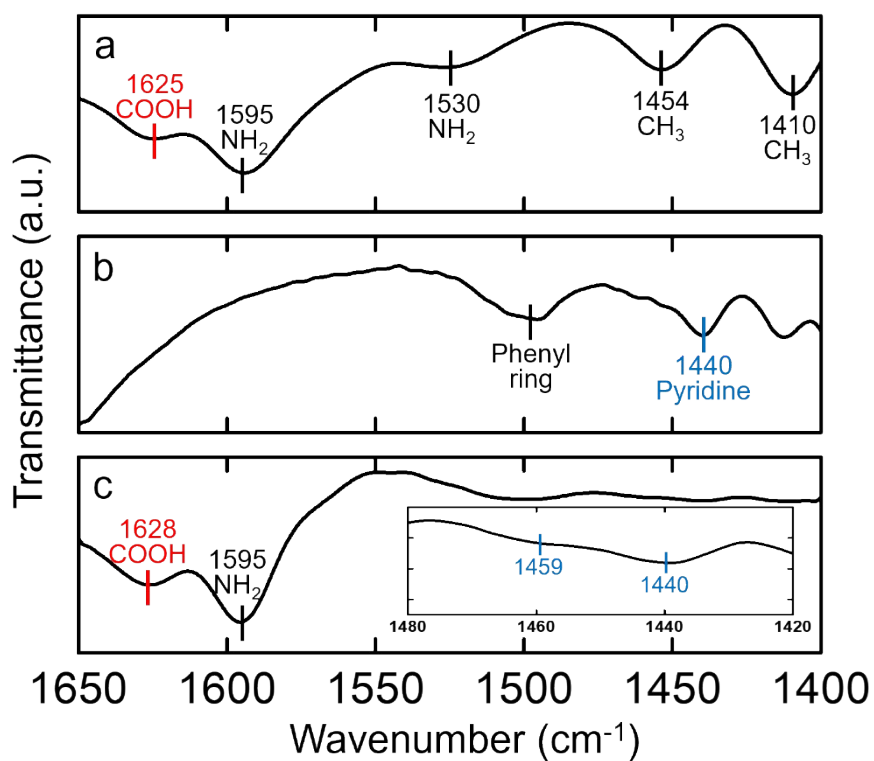

**Figure S4.** FTIR spectra of (a) *DL*-ala, (b) PS-*b*-P2VP, and (c) PS-*b*-P2VP/*DL*-ala (Inset: magnified spectrum in the range of 1520  $\text{cm}^{-1}$ -1400  $\text{cm}^{-1}$ ).

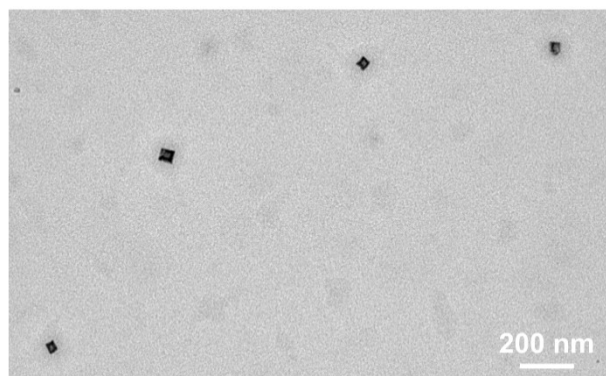

**Figure S5.** TEM image of the PS-*b*-P2VP inverse micelle-encapsulated MAPbBr<sub>3</sub> NCs prepared without *DL*-ala (average size: 20 nm).

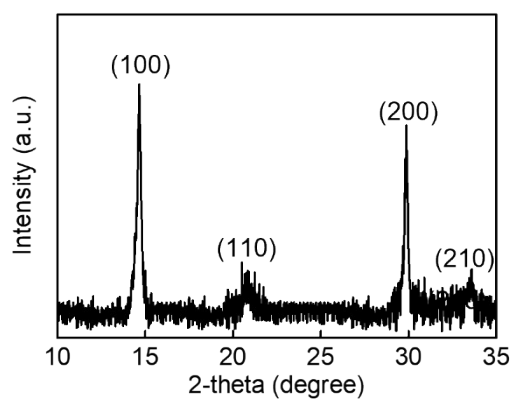

**Figure S6.** XRD pattern of the PS-*b*-P2VP inverse micelle-encapsulated MAPbBr<sub>3</sub> NCs prepared without *DL*-ala.

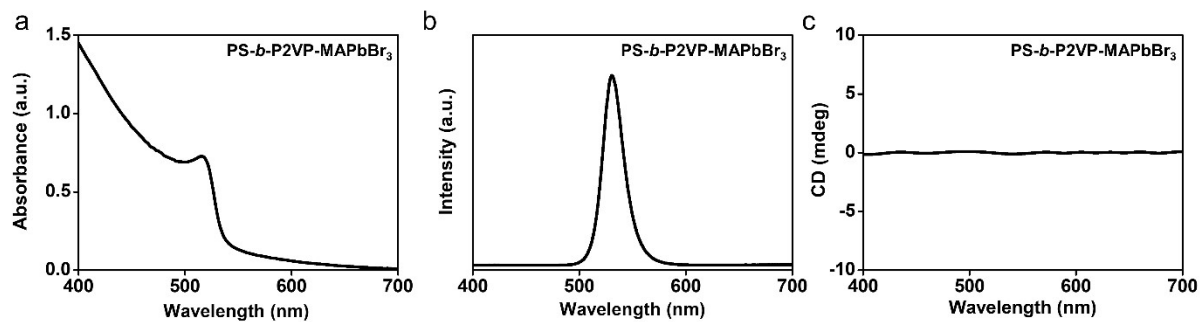

**Figure S7.** (a) Absorption, (b) PL, and (c) CD spectra of the PS-*b*-P2VP inverse micelle-encapsulated MAPbBr<sub>3</sub> NCs. The PL spectrum was taken under 365 nm ultraviolet irradiation.



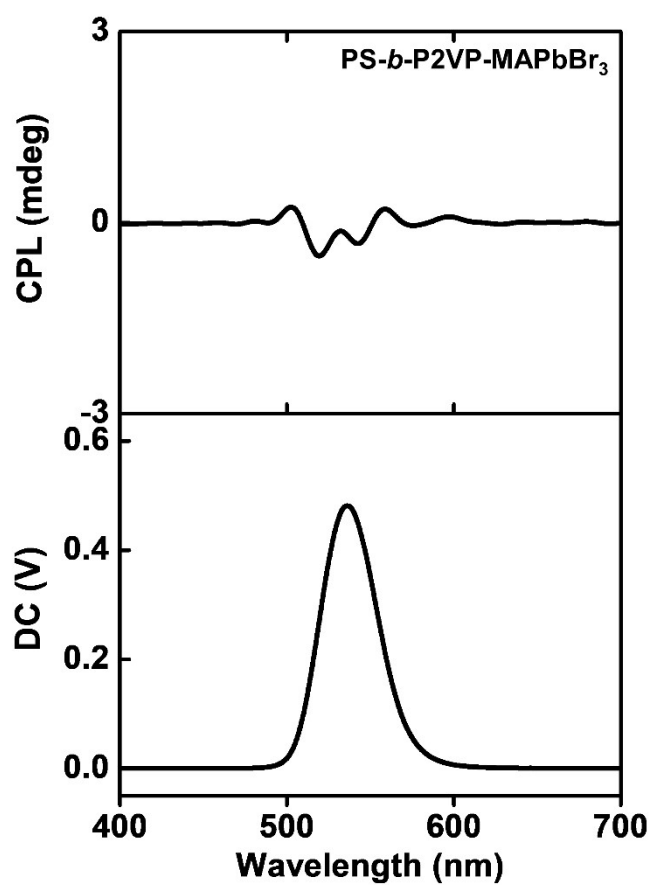

**Figure S8.** CPL and the corresponding DC spectra of the PS-*b*-P2VP inverse micelle-encapsulated MAPbBr<sub>3</sub> NCs. The CPL spectrum was recorded at room temperature under excitation by a 365 nm unpolarized light.

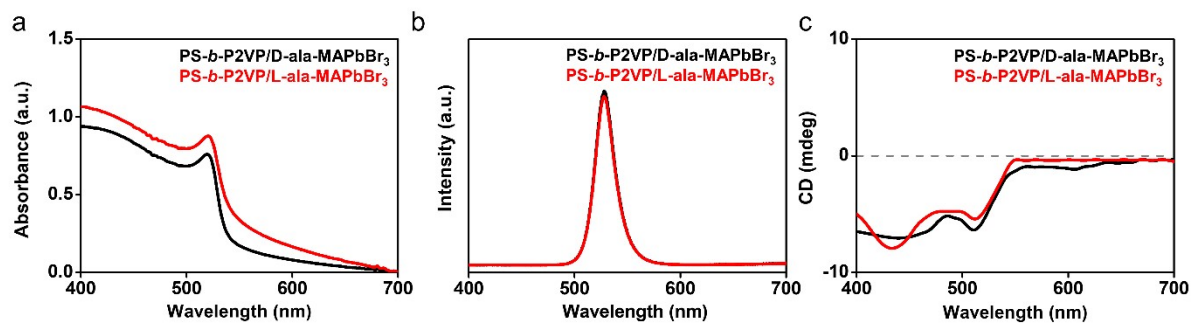

**Figure S9.** (a) Absorption, (b) PL, and (c) CD spectra of the MAPbBr<sub>3</sub> NCs fabricated using PS-*b*-P2VP inverse micelles as nanoreactors and *D*- or *L*-ala as a chiral additive. The PL spectra was recorded under 365 nm ultraviolet irradiation.

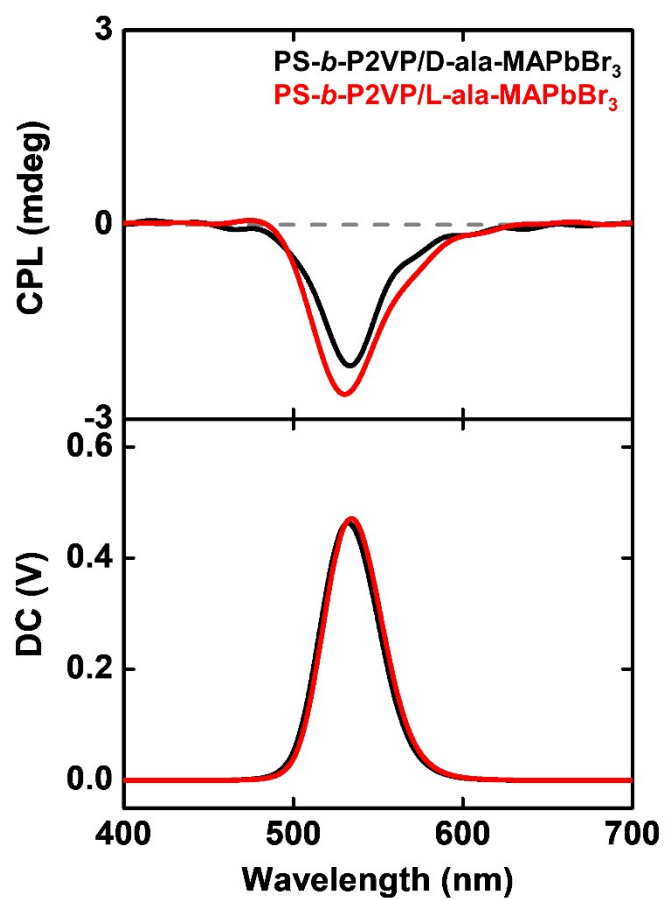

**Figure S10.** CPL and the corresponding CD spectra of the PS-*b*-P2VP/*D*(or *L*)-ala inverse micelle-encapsulated MAPbBr<sub>3</sub> NCs. The CPL spectra were recorded at room temperature under excitation by a 365 nm unpolarized light.

**Table S1.** PL decay fitting data for PS-*b*-P2VP and the PS-*b*-P2VP/*DL*-ala inverse micelle-encapsulated MAPbBr<sub>3</sub> NCs.

$$I(t) = a_1 \exp\left(-\frac{t}{\tau_1}\right) + a_2 \exp\left(-\frac{t}{\tau_2}\right)$$

|                      | PS- <i>b</i> -P2VP/MAPbBr <sub>3</sub> | PS- <i>b</i> -P2VP/ <i>DL</i> -ala/MAPbBr <sub>3</sub> |
|----------------------|----------------------------------------|--------------------------------------------------------|
| $a_1$                | 0.601                                  | 0.583                                                  |
| $\tau_1$             | 8.81 ns                                | 7.84 ns                                                |
| $a_2$                | 0.399                                  | 0.417                                                  |
| $\tau_2$             | 38.6 ns                                | 43.3 ns                                                |
| $\tau_{avg}^\dagger$ | 31.0 ns                                | 36.2 ns                                                |

$^\dagger\tau_{avg}$  was determined by the lifetime-weighted average calculations,

$$\tau_{avg} = \frac{\sum_i a_i \tau_i^2}{\sum_i a_i \tau_i}$$

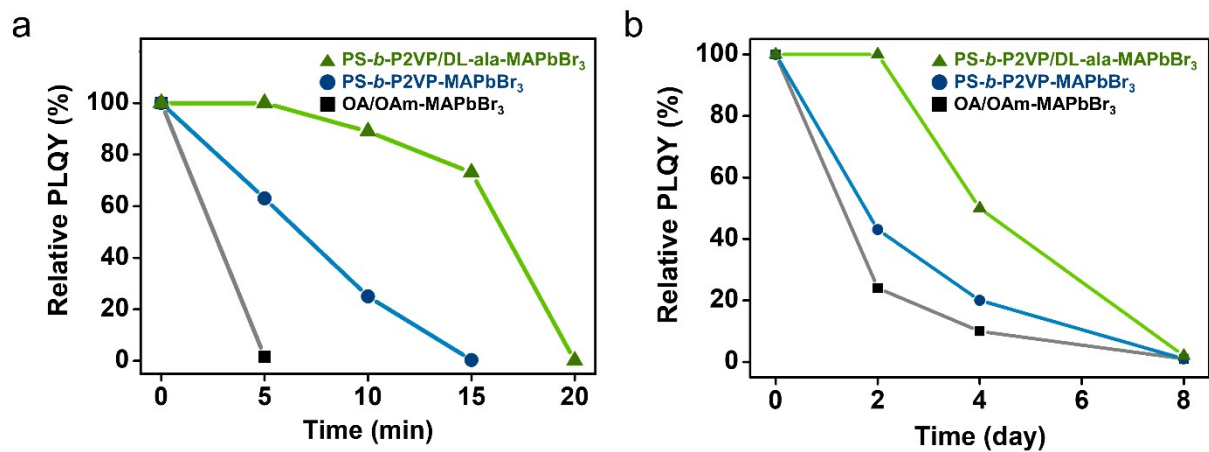

**Figure S11.** (a) Water and (b) thermal stabilities of the PS-*b*-P2VP/DL-ala inverse micelle-encapsulated MAPbBr<sub>3</sub> NCs (green). The OA and OAm-cocapped NCs (black) and the PS-*b*-P2VP inverse micelle-encapsulated MAPbBr<sub>3</sub> NCs (blue) were used as controls (the purification was not performed).

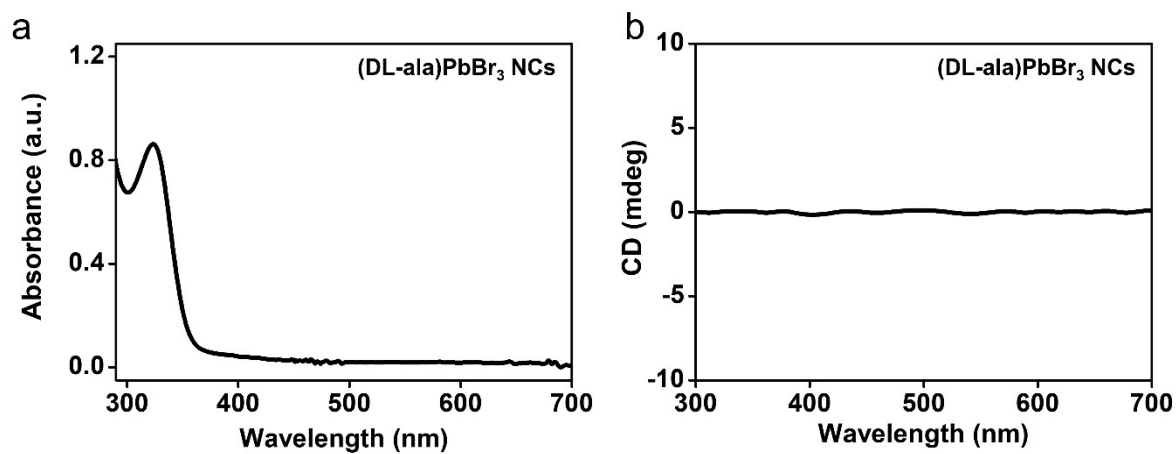

**Figure S12.** (a) Absorption and (b) CD spectra of the (*DL*-ala)PbBr<sub>3</sub> NCs encapsulated by the PS-*b*-P2VP inverse micelles.
